# Supplementary material for: Spatial and temporal pattern of wildfires in California from 2000 to 2019
Source: Sci Rep. 2021 Apr 22;11:8779. doi: 10.1038/s41598-021-88131-9 (PMC8062671; doi:10.1038/s41598-021-88131-9)
Supplement: Supplementary file 1 — Supplementary Information. [file 41598_2021_88131_MOESM1_ESM.pdf]

# Spatial and temporal pattern of wildfires in California from 2000 to 2019

Shu Li<sup>1,\*</sup> and Tirtha Banerjee<sup>1</sup>

<sup>1</sup>Department of Civil and Environmental Engineering, University of California, Irvine, Irvine, CA 92697, USA

\*To whom correspondence should be addressed. E-mail: shul15@uci.edu

## Supplementary Tables

|                                          |           | Estimated Parameter |                   | Goodness of fit test results |       |        |
|------------------------------------------|-----------|---------------------|-------------------|------------------------------|-------|--------|
|                                          |           | Shape ( $\alpha$ )  | Scale ( $\beta$ ) | AIC                          | KS    | CvM    |
| All wildfires<br>(1920-1999)             | Lognormal | 0.848               | 0.322             | 26,705.3                     | 0.073 | 18.945 |
|                                          | Weibull   | 3.730               | 2.720             | 25,836.4                     | 0.024 | 1.072  |
|                                          | Gamma     | 11.330              | 4.620             | 26,172.3                     | 0.053 | 9.850  |
| Natural wildfires<br>(1920-1999)         | Lognormal | 0.704               | 0.379             | 3,309.8                      | 0.052 | 1.148  |
|                                          | Weibull   | 2.870               | 2.440             | 3,418.4                      | 0.075 | 1.731  |
|                                          | Gamma     | 7.130               | 3.290             | 3,323.9                      | 0.053 | 1.049  |
| Human-caused<br>wildfires<br>(1920-1999) | Lognormal | 0.776               | 0.352             | 4,158.6                      | 0.059 | 1.957  |
|                                          | Weibull   | 3.270               | 2.570             | 4,143.3                      | 0.044 | 0.546  |
|                                          | Gamma     | 8.990               | 3.900             | 4,115.8                      | 0.044 | 1.219  |
| All wildfires<br>(2000-2019)             | Lognormal | 0.663               | 0.375             | 11,209.8                     | 0.048 | 3.391  |
|                                          | Weibull   | 2.800               | 2.340             | 11,844.6                     | 0.088 | 8.936  |
|                                          | Gamma     | 6.860               | 3.300             | 11,358.5                     | 0.057 | 3.641  |
| Natural wildfires<br>(2000-2019)         | Lognormal | 0.743               | 0.401             | 3,189.5                      | 0.065 | 1.598  |
|                                          | Weibull   | 2.770               | 2.560             | 3,254.3                      | 0.072 | 1.999  |
|                                          | Gamma     | 6.530               | 2.870             | 3,195.0                      | 0.070 | 1.631  |
| Human-caused<br>wildfires<br>(2000-2019) | Lognormal | 0.642               | 0.358             | 4,345.2                      | 0.048 | 1.100  |
|                                          | Weibull   | 2.920               | 2.280             | 4,609.3                      | 0.088 | 3.097  |
|                                          | Gamma     | 7.540               | 3.720             | 4,399.0                      | 0.055 | 1.097  |

Table 1: The fitting parameters of frequency distribution of the logarithm of wildfire burned area and the goodness of fit test results

| Fire Frequency            |           | slope | intercept | Burned Area               |           | slope | intercept |
|---------------------------|-----------|-------|-----------|---------------------------|-----------|-------|-----------|
| All wildfires             | 1920-1999 | 1.31  | -2,434    | All wildfires             | 1920-1999 | 0.84  | -1,392    |
|                           | 2000-2019 | 5.32  | -10,445   |                           | 2000-2019 | 21.70 | -42,921   |
| Large wildfire            | 1920-1999 | 0.24  | -426      | Large wildfire            | 1920-1999 | 0.74  | -1,215    |
|                           | 2000-2019 | -1.29 | 2,650     |                           | 2000-2019 | 21.64 | -42,834   |
| Small wildfires           | 1920-1999 | 1.11  | -2,077    | Small wildfires           | 1920-1999 | 0.10  | -179      |
|                           | 2000-2019 | 5.87  | -11,614   |                           | 2000-2019 | -0.22 | 462       |
| Naturalwildfires          | 1920-1999 | 0.47  | -904      | Naturalwildfires          | 1920-1999 | 0.70  | -3,543    |
|                           | 2000-2019 | 2.02  | -3,990    |                           | 2000-2019 | 6.18  | -19,123   |
| Human-caused<br>wildfires | 1920-1999 | 1.05  | -2,033    | Human-caused<br>wildfires | 1920-1999 | 2.09  | -4,042    |
|                           | 2000-2019 | 2.74  | -5,404    |                           | 2000-2019 | 7.18  | -14,233   |

Table 2: Segmented linear regression coefficients for temporal distribution of wildfire frequency and burned area

| Variable                                  | PC Coefficients |        |        |        |        | PC Coefficients |        |        |        |        |
|-------------------------------------------|-----------------|--------|--------|--------|--------|-----------------|--------|--------|--------|--------|
|                                           | PC1             | PC2    | PC3    | PC4    | PC5    | PC1             | PC2    | PC3    | PC4    | PC5    |
| Distance to Roads (km)                    | -0.020          | -0.552 | 0.243  | -0.259 | 0.058  | -0.028          | -0.557 | 0.169  | -0.274 | 0.353  |
| Housing Density (houses/km <sup>2</sup> ) | -0.042          | 0.429  | 0.211  | -0.290 | 0.818  | -0.034          | 0.436  | 0.062  | -0.802 | 0.355  |
| Aspect (°)                                | 0.305           | -0.400 | -0.246 | 0.090  | 0.375  | 0.301           | -0.387 | -0.309 | -0.145 | 0.167  |
| Slope (°)                                 | 0.348           | -0.358 | -0.204 | 0.146  | 0.296  | 0.347           | -0.342 | -0.297 | -0.091 | 0.095  |
| Tree (%)                                  | 0.429           | 0.132  | -0.057 | 0.170  | 0.028  | 0.425           | 0.119  | -0.022 | 0.121  | 0.171  |
| Shrub (%)                                 | 0.402           | 0.157  | -0.135 | 0.231  | -0.003 | 0.401           | 0.154  | -0.115 | 0.181  | 0.259  |
| Grass (%)                                 | 0.311           | 0.393  | -0.093 | 0.161  | -0.159 | 0.309           | 0.375  | 0.032  | 0.279  | 0.354  |
| Max Temperature (°C)                      | -0.386          | 0.098  | -0.423 | 0.355  | 0.199  | -0.374          | 0.137  | -0.477 | 0.161  | 0.393  |
| Max Vapor Pressure Deficit (hPa)          | -0.432          | -0.100 | -0.354 | 0.284  | 0.134  | -0.422          | -0.062 | -0.422 | 0.138  | 0.253  |
| Fire Occurrence Density                   | 0.072           | 0.083  | -0.679 | -0.710 | -0.124 | -               | -      | -      | -      | -      |
| Fire Occurrence Density with Burned Area  | -               | -      | -      | -      | -      | 0.179           | 0.177  | -0.603 | -0.287 | -0.522 |
| Cumulative proportion                     | 0.379           | 0.541  | 0.649  | 0.739  | 0.823  | 0.387           | 0.551  | 0.666  | 0.756  | 0.824  |

Table 3: Principal component coefficients for wildfire-related variables and wildfire density with and without burned areas weighting.

## Supplementary Figures

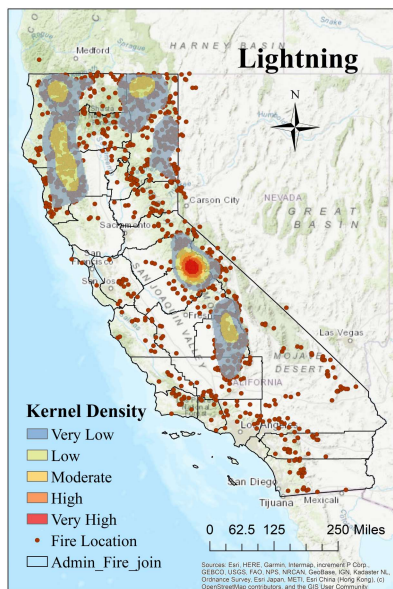

(a) lightning

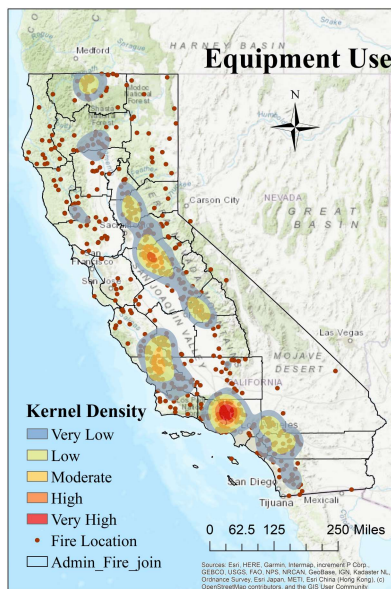

(b) equipment use

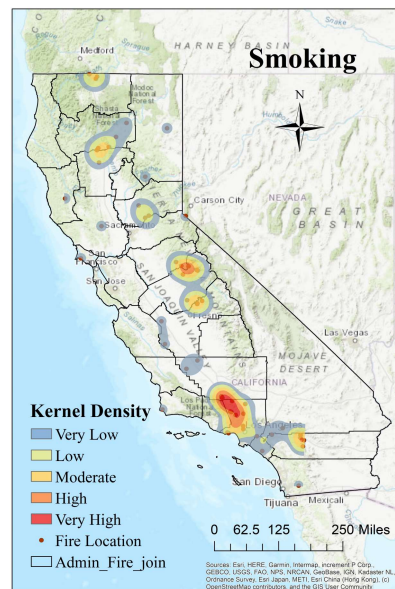

(c) smoking

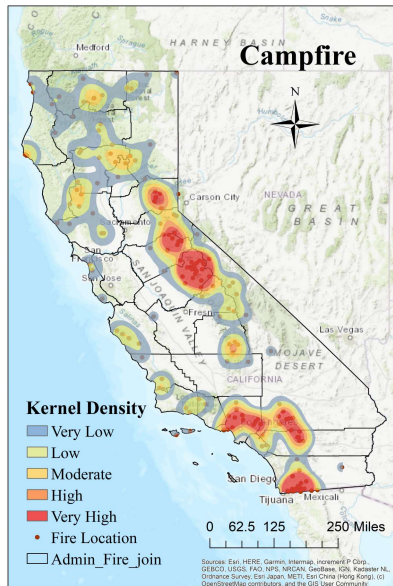

(d) campfire

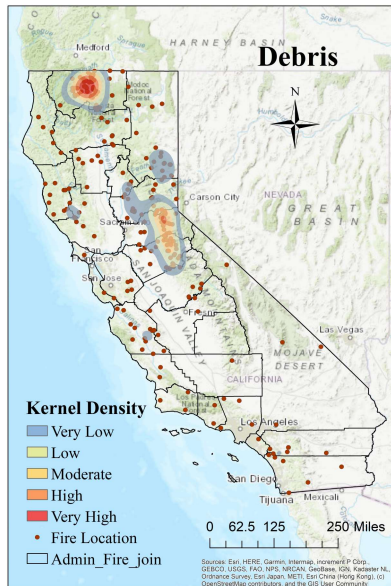

(e) debris

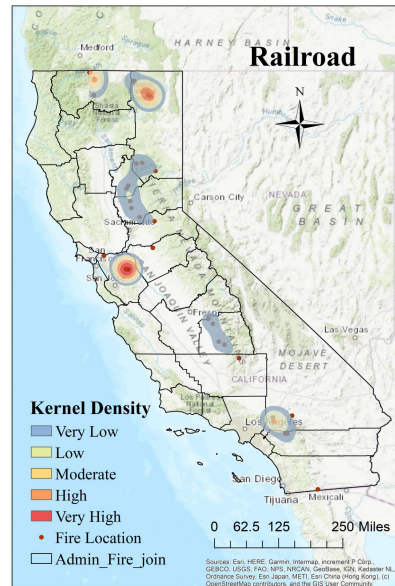

(f) railroad

Supplementary Figure 1: KDE results for wildfires with different causes

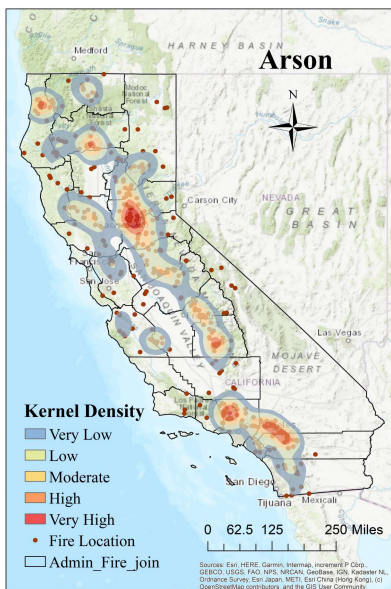

(g) arson

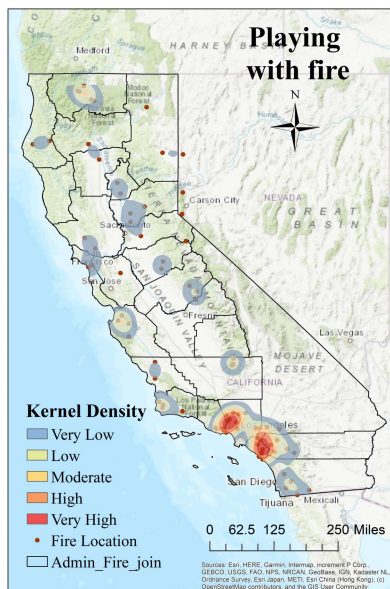

(h) playing with fire

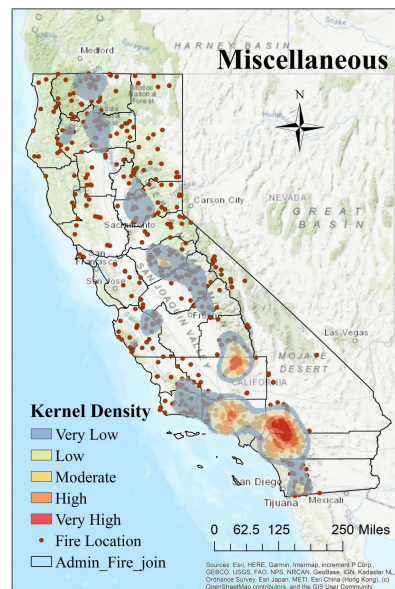

(i) miscellaneous

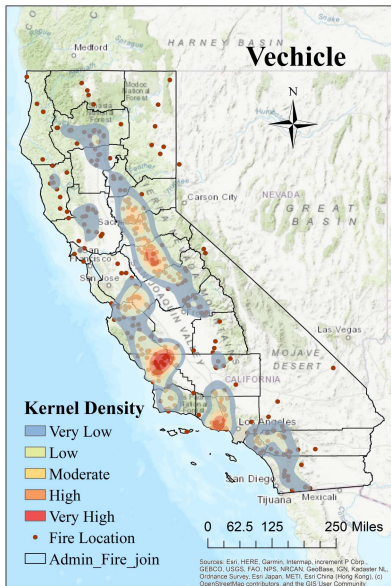

(j) vehicle

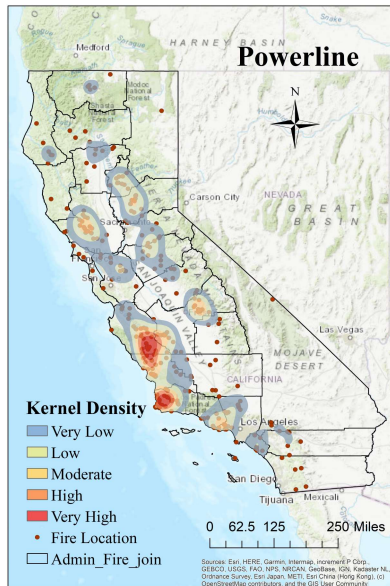

(k) power line

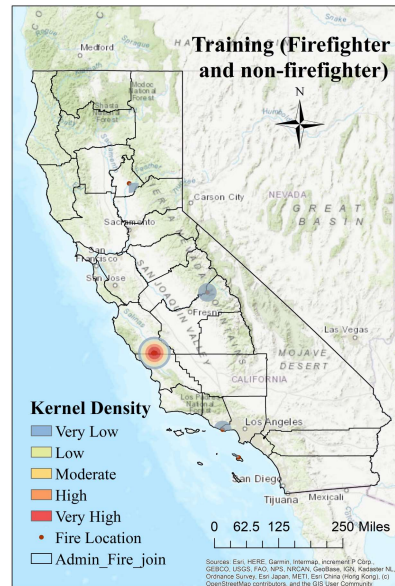

(l) training

Supplementary Figure 1: KDE results for wildfires with different causes

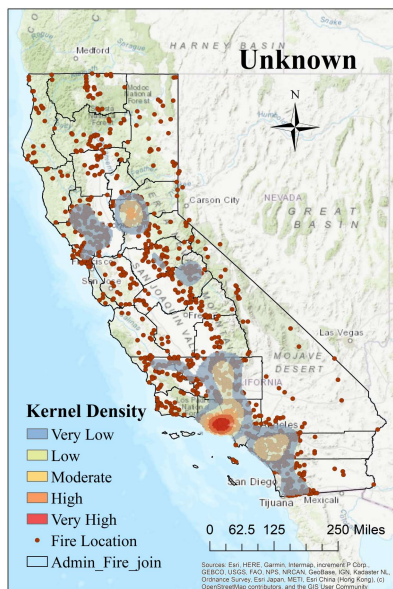

(m) unknown

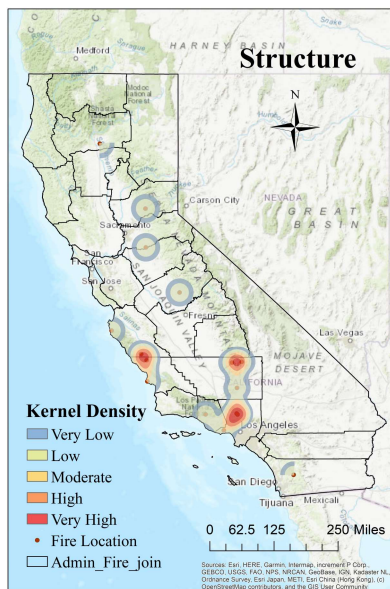

(n) structure

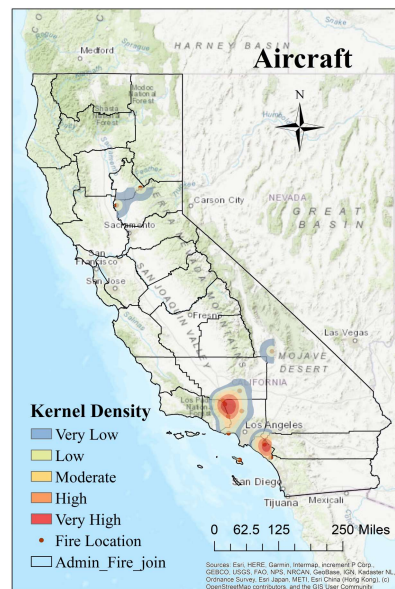

(o) aircraft

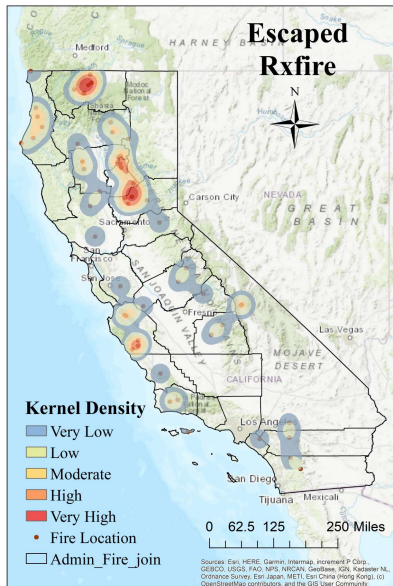

(p) escaped Rxfire

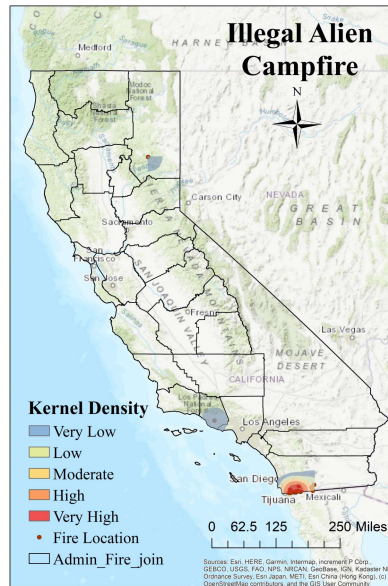

(q) illegal alien campfire

Supplementary Figure 1: KDE results for wildfires with different causes
